# Supplementary material for: The causal relationship between gastro-oesophageal reflux disease and idiopathic pulmonary fibrosis: a bidirectional two-sample Mendelian randomisation study
Source: PubMed Central journal article supplement (PMC10209472; doi:10.1183/13993003.01585-2022), 2023-05-25
Supplement: ERJ-01585-2022.Methods.pdf [file ERJ-01585-2022.Methods.pdf]

## Supplementary Methods

### *MR methods*

We estimated the causal effect of GERD on IPF risk and of IPF on GERD risk by first deriving SNP-specific MR estimates using the Wald estimator, obtained by dividing the gene-outcome (G-Y) by the gene-exposure (G-X) association estimate (both expressed as logOR), with standard error obtained using the Delta method. [1] The estimate of the causal effect was then obtained by pooling the SNP-specific MR estimates using an Inverse-Variance Weighted Fixed-Effect meta-analysis (IVW-FE). [1] Although the linearity assumption underlying our MR analysis is violated when using binary variables [2], as in our case, the magnitude of the resulting bias has been shown to be negligible. [3]

### *Investigation of pleiotropy*

The IVW-FE method used for our MR analyses is the most powerful but assumes absence of pleiotropy [4], i.e. variants chosen as instruments for the exposure cannot affect the outcome through any other independent pathways. As pleiotropy can bias MR findings [5], we investigated its possible presence through assessment of: the heterogeneity in the MR estimates across SNPs, using the  $I^2$  index and the Q heterogeneity test [6].

In the presence of pleiotropy, possible pleiotropic SNPs were identified graphically based on their contribution to the overall heterogeneity (Cochran's Q statistic) as previously described [7], and we repeated the IVW-FE analysis after removing the pleiotropic SNPs. We also repeated the MR analyses on all SNPs using methods that can account for pleiotropy under different assumptions about its nature. [8] In particular, we considered the following methods:

- Inverse Variance Weighted Random-Effect (IVW-RE)[9]: This was performed in the same way as IVW-FE, but a (multiplicative) *random-effects*, instead of a *fixed-effect*, meta-analysis model was used to allow for pleiotropy. IVW-RE assumes that pleiotropic effects across SNPs are random (balanced pleiotropy), and that their magnitude is independent of the magnitude of the corresponding G-X effects (InSIDE assumption). [4]
- Weighted Median estimator (WMe) [10]: This method assumes that more than 50% of the information contributing to the MR analysis comes from genetic variants that are valid (i.e. they are not pleiotropic). [10]
- Weighted Mode estimator (WMo) [11]: This method assumes that the largest weighted contribution of "similar" (i.e. identical in infinite samples) SNP-specific MR estimates comes from valid instruments. [12]
- MR-Egger regression (MRE) [13]: In this method, G-Y estimates for the individual SNPs are regressed on their G-X estimates; the intercept of this regression model represents the overall pleiotropy, and the slope the MR estimate adjusted for pleiotropy. [14] MRE assumes an overall directional pleiotropy, and it makes the InSIDE assumption. MRE works well only in the presence of a large spread of strengths, which can be quantified by the heterogeneity in G-X estimates across

SNPs,  $I^2_{GX}$ , with a recommended  $I^2_{GX} > 90\%$ . [13] As the  $I^2_{GX}$  was lower than 90% for both our MR analyses, we attempted to address this limitation using the SIMulation EXtrapolation (SIMEX) method that corrects for the dilution bias. [13]

The MR analyses were performed using the R packages “MendelianRandomization” (<https://cran.r-project.org/web/packages/MendelianRandomization/index.html>) and MR-PRESSO (<https://github.com/rondolab/MR-PRESSO>). The code for all the MR analyses is provided below.

#### R code

```
# Bi-directional Mendelian randomization analyses
# GERD and IPF

rm(list=ls())
#install.packages("MendelianRandomization")
#install.packages("simex")
#install.packages("MRPRESSO")
library(MendelianRandomization)
library(simex)
library(MRPRESSO)

A <- read.table("data.txt", sep="\t", header=T)
head(A)
dim(A)

#####
# MR-PRESSO
#####
mr_presso(BetaOutcome = "b_y", BetaExposure = "b_x", SdOutcome = "se_y", SdExposure = "se_x", OUTLIERtest = TRUE, DISTORTIONtest = TRUE, data = A, NbDistribution = 1000, SignifThreshold = 0.05)

#####
# IVW fixed effects
#####
mr_ivw(mr_input(bx = A$b_x, bxse = A$se_x, by = A$b_y, byse = A$se_y), model="fixed")

#####
#IVW multiplicative random effects
#####
mr_ivw(mr_input(bx = A$b_x, bxse = A$se_x, by = A$b_y, byse = A$se_y),
model="random")

#####
# MR-Egger
```

```
#####
mr_egger(mr_input(bx = A$b_x, bxse = A$se_x, by = A$b_y, byse = A$se_y))

#####
# MR-Egger with simex adjustment
#####
# dilution bias evaluation
#####
lsq <- function(y,s){
  k <- length(y)
  w <- 1/s^2; sum.w <- sum(w)
  mu.hat <- sum(y*w)/sum.w
  Q <- sum(w*(y-mu.hat)^2)
  lsq <- (Q - (k-1))/Q
  lsq <- max(0, lsq)
  return(lsq)
}

l2_gx <- lsq(A$b_x, A$se_x)
l2_gx

bxg <- A$b_x
seX <- A$se_x
byg <- A$b_y
seY <- A$se_y

BetaYG <- byg*sign(bxg)
BetaXG <- abs(bxg)

Fit2 <- lm(BetaYG~BetaXG,weights=1/seY^2,x=TRUE,y=TRUE)
mod.sim <- simex(Fit2,B=1000, measurement.error = seX,
SIMEXvariable="BetaXG",fitting.method ="quad",asymptotic="FALSE")
summary(mod.sim)

#####
# Weighted MR median
#####
mr_median(mr_input(bx = A$b_x, bxse = A$se_x, by = A$b_y, byse = A$se_y),
          weighting = "weighted", iterations = 10000)

#####
# Mode-based MR
#####
mr_mbe(mr_input(bx = A$b_x, bxse = A$se_x, by = A$b_y, byse = A$se_y), phi=1,
iterations=100)
QA1

#####
```

```

# Plot of individual SNP contributions to Cochran's Q heterogeneity statistics
#####

BIV <- A$b_y/A$b_x
se_IV <-sqrt(A$se_y^2/A$b_x^2)

w <- 1/(se_IV^2)
y <- BIV

sum.w <- sum(w)
mu.hat <- sum(y*w)/sum.w
Q_ivw <- w*(y-mu.hat)^2
su <- summary(Q_ivw)

plot(Q_ivw, pch = 19, ylab="", xlab = "", ylim=c(0,su[6]+1), xaxt = 'n', main="IPF-GERD")
title(ylab="Cochran Q contribution", line = 1.9)
title(xlab = "Instruments", line = 0.5)
L1 <- qchisq(1-0.05, df = 1)
L2 <- qchisq(1-(0.05/19), df = 1)

#add dotted line at 0.05
abline(L1,0,lty = 3, col = "red")

#add dotted line at 0.05/19
abline(L2,0, lty = 2, col = "red")

#Add rs names of instruments
text(4, Q_ivw[4], labels=A[4,1], cex= 0.6, pos=1)
text(7, Q_ivw[7], labels=A[7,1], cex= 0.6, pos=3)
text(8, Q_ivw[8], labels=A[8,1], cex= 0.6, pos=1)
text(13, Q_ivw[13], labels=A[13,1], cex= 0.6, pos=1)
text(16, Q_ivw[16], labels=A[16,1], cex= 0.6, pos=1)

#####

```

## References

1. Thompson JR, Minelli C, Del Greco M F. Mendelian Randomization using Public Data from Genetic Consortia. *Int J Biostat.* 2016;12. doi:10.1515/ijb-2015-0074
2. Vansteelandt S, Bowden J, Babanezhad M, Goetghebeur E. On Instrumental Variables Estimation of Causal Odds Ratios. *SSO Schweiz Monatsschr Zahnheilkd.* 2011;26: 403–422.
3. Zhao Q, Wang J, Hemani G, Bowden J, Small DS. Statistical inference in two-sample summary-data Mendelian randomization using robust adjusted profile score. *The Annals of Statistics.* 2020. doi:10.1214/19-aos1866

4. Bowden J, Del Greco M F, Minelli C, Smith GD, Sheehan N, Thompson J. A framework for the investigation of pleiotropy in two-sample summary data Mendelian randomization. *Statistics in Medicine*. 2017. pp. 1783–1802. doi:10.1002/sim.7221
5. Sheehan NA, Didelez V, Burton PR, Tobin MD. Mendelian Randomisation and Causal Inference in Observational Epidemiology. *PLoS Medicine*. 2008. p. e177. doi:10.1371/journal.pmed.0050177
6. Greco M FD, Minelli C, Sheehan NA, Thompson JR. Detecting pleiotropy in Mendelian randomisation studies with summary data and a continuous outcome. *Stat Med*. 2015;34: 2926–2940.
7. Bowden J, Del Greco M F, Minelli C, Zhao Q, Lawlor DA, Sheehan NA, et al. Improving the accuracy of two-sample summary data Mendelian randomization: moving beyond the NOME assumption. doi:10.1101/159442
8. Hemani G, Bowden J, Davey Smith G. Evaluating the potential role of pleiotropy in Mendelian randomization studies. *Hum Mol Genet*. 2018;27: R195–R208.
9. Bowden J, Del Greco M F, Minelli C, Zhao Q, Lawlor DA, Sheehan NA, et al. Improving the accuracy of two-sample summary-data Mendelian randomization: moving beyond the NOME assumption. *Int J Epidemiol*. 2019;48: 728–742.
10. Bowden J, Davey Smith G, Haycock PC, Burgess S. Consistent Estimation in Mendelian Randomization with Some Invalid Instruments Using a Weighted Median Estimator. *Genet Epidemiol*. 2016;40: 304–314.
11. Hartwig FP, Davey Smith G, Bowden J. Robust inference in summary data Mendelian randomization via the zero modal pleiotropy assumption. *Int J Epidemiol*. 2017;46: 1985–1998.
12. Hartwig FP, Smith GD, Bowden J. Robust inference in summary data Mendelian randomization via the zero modal pleiotropy assumption. *International Journal of Epidemiology*. 2017. pp. 1985–1998. doi:10.1093/ije/dyx102
13. Bowden J, Del Greco M F, Minelli C, Davey Smith G, Sheehan NA, Thompson JR. Assessing the suitability of summary data for two-sample Mendelian randomization analyses using MR-Egger regression: the role of the I<sup>2</sup> statistic. *Int J Epidemiol*. 2016;45: 1961–1974.
14. Bowden J, Davey Smith G, Burgess S. Mendelian randomization with invalid instruments: effect estimation and bias detection through Egger regression. *Int J Epidemiol*. 2015;44: 512–525.
